# Supplementary material for: A checklist for assessing the methodological quality of concurrent tES-fMRI studies (ContES checklist): a consensus study and statement
Source: Springer Nature journal article supplement (doi:10.1038/s41596-021-00664-5), 2022-02-04
Supplement: MOESM1 [file 41596_2021_664_MOESM1_ESM13.pdf]

---

## Supplementary information

---

# **A checklist for assessing the methodological quality of concurrent tES-fMRI studies (ContES checklist): a consensus study and statement**

---

In the format provided by the  
authors and unedited

**Supplementary Table 1 | Supporting Evidence and Example Articles for each Checklist Item.** The “Supporting Evidence” column includes studies which demonstrate how each checklist item might affect the results of a concurrent tES-fMRI study and its importance for interpretability and generalizability. Where empirical evidence is scarce, results from adjacent fields in cognitive neuroscience, qualitative reviews, and the statement by the Committee on Best Practice in Data Analysis and Sharing are cited. The “Reporting Example” column includes a number of exemplar papers which have reported each item.

| Section/Topic                                            | Item No | Main Items to Report                                                                                                                                                                                           | Supporting Evidence | Reporting Example |
|----------------------------------------------------------|---------|----------------------------------------------------------------------------------------------------------------------------------------------------------------------------------------------------------------|---------------------|-------------------|
| <b><i>Technological Factors</i></b>                      |         |                                                                                                                                                                                                                |                     |                   |
| Manufacturer of MR Conditional Stimulator                | 1.1     | The brand and model (if a brand is providing different MR conditional models) for the MR conditional stimulator.                                                                                               | 1                   | 2,3               |
| MR Conditional Electrode Details                         | 1.2     | The MR conditional electrode type (i.e., conductive polymer with or without a sponge or other conductive medium holders).                                                                                      | 4                   | 5,6               |
| Electrode Positioning                                    | 1.3     | The method for electrode placement over the head inside the scanner (i.e., targeting software, 10-20 convention with or without EEG cap, functional targeting (fMRI), computational head models or others).    | 7–10                | 11,12             |
| MR Conditional Skin-Electrode Interface                  | 1.4     | The MR conditional skin-electrode interface (saline solution, conductive paste, gel, etc.).                                                                                                                    | 1,4,13              | 14,15             |
| Amount of Contact Medium (Paste/Gel/Electrolyte)         | 1.5     | The amount or thickness of medium that is used for each electrode or a method to control this confounding variable.                                                                                            | 1,13,16             | 17,18             |
| Electrode Placement Visualization                        | 1.6     | Any photo/diagram/figure to precisely visualize the electrode montage inside the scanner and make replication possible.                                                                                        | 19–21               | 22,23             |
| RF Filter                                                | 1.7     | The RF filtering method (stimulator device connected to the subject via penetration panel (e.g., RF filters from different brands) or connected via waveguide with RF boxes on either end).                    | 20                  | 24,25             |
| Wire Routing Pattern                                     | 1.8     | Wire routing pattern (out back of bore and around the control room or straight down front of bore to control room).                                                                                            | 20,26               | 27,28             |
| tES-fMRI Machine Synchronization/Communication           | 1.9     | The synchronization/communication method between the tES device, the stimulus delivery PC, and the scanner.                                                                                                    | 29                  | 30,31             |
| <b><i>Safety and Noise Tests</i></b>                     |         |                                                                                                                                                                                                                |                     |                   |
| MR Conditionality Specifics for tES Setting              | 2.1     | The technical specifications of the MR scanner, the applied fMRI sequences, and the used tES settings and configuration to fall within the specifics of MR conditionality based on tES manufacturer guideline. | 32,33               | 34,35             |
| tES-fMRI Setting Test - Safety Testing                   | 2.2     | The safety of the tES-fMRI setting.                                                                                                                                                                            | 36–38               | 39,40             |
| tES-fMRI Setting Test - Subjective Intolerance Reporting | 2.3     | The number of cases that have not tolerated the tES/fMRI session (even if it is zero).                                                                                                                         | 41                  | 42,43             |
| tES-fMRI Setting Test - Noise/Artifact                   | 2.4     | The noise/artifact induced by the tES setting in the fMRI signal with real human subjects or phantoms before starting the study (It can be reported or referred to previous studies with the same setting).    | 19,44               | 40,45             |
| Impedance Testing                                        | 2.5     | Impedance monitoring (i.e., before entering the scanner room and/or in the scanner room and/or inside the scanner and/or during scanning).                                                                     | 46,47               | 48,49             |
| <b><i>Methodological Factors</i></b>                     |         |                                                                                                                                                                                                                |                     |                   |
| Concurrent tES-fMRI Timing                               | 3.1     | The timing of concurrent tES within the fMRI paradigm.                                                                                                                                                         | 29,50–52            | 53,54             |
| Imaging Session Timing                                   | 3.2     | The imaging events before and after concurrent tES-fMRI and respective sequences.                                                                                                                              | 55,56               | 57,58             |
| tES Experience Report                                    | 3.3     | The assessment of the subjective experience of receiving tES inside the scanner.                                                                                                                               | 41,59               | 60,61             |

**Supplementary Table 2 | Summary of concurrent tES-fMRI studies.** This table provides details about the 57 concurrent tES-fMRI studies, which were included in our database during developing the checklist. This table summarizes the number of recruited participants, the electrode montage, the intensity, duration, and type of stimulation.

| Author, Year                     | Participants           | tES Montage                               | Intensity (mA)       | Duration (min)                      | tES Method | Reference          |
|----------------------------------|------------------------|-------------------------------------------|----------------------|-------------------------------------|------------|--------------------|
| (Hauser et al. 2016)             | 48 Healthy subjects    | Between CP5 and P5/Between Fpz and AF8    | 1                    | 30                                  | tDCS       | <a href="#">2</a>  |
| (Callan et al. 2016)             | 28 Healthy subjects    | P4/Left shoulder                          | 1                    | 30                                  | tDCS       | <a href="#">62</a> |
| (Alekseichuk et al. 2016)        | 16 Healthy subjects    | Oz/Cz                                     | 1 (peak-to-baseline) | 10                                  | tDCS, tACS | <a href="#">3</a>  |
| (Worsching et al. 2017)          | 20 Healthy subjects    | F3/F4                                     | 2                    | 20                                  | tDCS       | <a href="#">5</a>  |
| (Antonenko et al. 2017)          | 48 Older adults        | C3/Fp2                                    | 1                    | 15                                  | tDCS       | <a href="#">53</a> |
| (Lin et al. 2017)                | 18 Healthy subjects    | F3/FP2                                    | 1                    | 20                                  | tDCS       | <a href="#">6</a>  |
| (Zheng et al. 2016)              | 9 Healthy subjects     | 1/3 of the distance between F8 and C6/Fp1 | 1                    | 10                                  | tDCS       | <a href="#">11</a> |
| (Yang et al. 2017)               | 32 Smokers             | F3/F4                                     | 1                    | 30                                  | tDCS       | <a href="#">12</a> |
| (Darkow et al. 2017)             | 16 post-stroke aphasia | C3/Fp2                                    | 1                    | 20                                  | tDCS       | <a href="#">54</a> |
| (Sotnikova et al. 2017)          | 16 ADHD                | F3/Cz                                     | 1                    | 20                                  | tDCS       | <a href="#">63</a> |
| (Lindenberg et al. 2016)         | 24 Healthy subjects    | C3/C4<br>C3/Fp2                           | 1                    | 30                                  | tDCS       | <a href="#">14</a> |
| (Holland et al. 2016)            | 10 Healthy subjects    | FC5/Fp2                                   | 2                    | 20                                  | tDCS       | <a href="#">64</a> |
| (Barron et al. 2016)             | 53 Healthy subjects    | T6/Fp1                                    | 1                    | 20                                  | tDCS       | <a href="#">15</a> |
| (Meinzer et al. 2015)            | 18 MCI                 | Left ventral IFG/Fp2                      | 1                    | 20                                  | tDCS       | <a href="#">65</a> |
| (Meinzer et al. 2014)            | 18 Older adults        | C3/C4<br>C3/Fp2                           | 1                    | 30                                  | tDCS       | <a href="#">22</a> |
| (Antal et al. 2014)              | 60 Healthy subjects    | F2-Fpz/O2-P4<br>O2-P4/F2-Fpz              | 1                    | 20                                  | tDCS       | <a href="#">66</a> |
| (Martin et al. 2017)             | 24 Healthy subjects    | C3/C4<br>C3/Fp2                           | 1                    | 30                                  | tDCS       | <a href="#">67</a> |
| (Orlov et al. 2017)              | 49 Schizophrenia       | F3/Fp2                                    | 2                    | 30                                  | tDCS       | <a href="#">57</a> |
| (Meinzer et al. 2013)            | 20 Older adults        | Left ventral IFG/Fp2                      | 1                    | 20                                  | tDCS       | <a href="#">23</a> |
| (Stagg et al. 2013)              | 24 Healthy subjects    | F3/Fp2<br>Fp2/F3                          | 1                    | 20                                  | tDCS       | <a href="#">58</a> |
| (Lindenberg et al. 2013)         | 20 Healthy subjects    | C3/C4<br>C3/Fp2                           | 1                    | 30                                  | tDCS       | <a href="#">24</a> |
| (Sehm et al. 2013)               | 12 Healthy subjects    | C4/Fp1<br>C4/C3                           | 1                    | 20                                  | tDCS       | <a href="#">50</a> |
| (Saiote et al. 2013)             | 52 Healthy subjects    | C3/Fp2<br>Fp2/C3                          | 1                    | 10                                  | tDCS       | <a href="#">68</a> |
| (Sehm et al. 2012)               | 12 Healthy subjects    | C4/Fp1<br>C4/C3                           | 1                    | 20                                  | tDCS       | <a href="#">51</a> |
| (Kwon and Jang 2012)             | 9 Healthy subjects     | C3/C4<br>C3/Fp2                           | 1                    | 2                                   | tDCS       | <a href="#">69</a> |
| (Meinzer et al. 2012)            | 20 Healthy subjects    | Left IFG/Fp2                              | 1                    | 17                                  | tDCS       | <a href="#">70</a> |
| (Zheng, Alsop, and Schlaug 2011) | 14 Healthy subjects    | C4/FP1<br>Fp1/C4                          | 1.4                  | 3 ON and 4 OFF blocks during 10 min | tDCS       | <a href="#">71</a> |
| (Holland et al. 2011)            | 10 Older adults        | FC5/Fp2                                   | 2                    | 20                                  | tDCS       | <a href="#">72</a> |
| (Alon et al. 2011)               | 5 Healthy subjects     | C4/Fp1                                    | 2                    | 12.8                                | tDCS       | <a href="#">25</a> |
| (Kwon and Jang 2011)             | 12 Healthy subjects    | C3/Fp2                                    | 1                    | 2                                   | tDCS       | <a href="#">73</a> |
| (Antal et al. 2011)              | 20 Healthy subjects    | Between O1-P3/Between O2-P4               | 1                    | 0.33                                | tDCS       | <a href="#">74</a> |

|                                               |                                       | Between O2-P4/Between<br>O1-P3                                                  |                                  |                                                               |      |    |
|-----------------------------------------------|---------------------------------------|---------------------------------------------------------------------------------|----------------------------------|---------------------------------------------------------------|------|----|
| (Kwon et al. 2008)                            | 11 Healthy subjects                   | C3/Fp2                                                                          | 1                                | 1.4                                                           | tDCS | 75 |
| (Li, Violante, Leech, Hampshire, et al. 2019) | 26 Healthy subjects                   | F8/Right shoulder<br>Right shoulder/F8                                          | 2                                | 3 blocks of<br>anodal/cathodal<br>/sham (each one<br>4.2 min) | tDCS | 48 |
| (Li, Violante, Leech, Ross, et al. 2019)      | 26 Healthy subjects                   | F8/Right shoulder<br>Right shoulder/F8                                          | 2                                | 3 blocks of<br>anodal/cathodal<br>/sham (each one<br>4.2 min) | tDCS | 52 |
| (Gilam et al. 2018)                           | 25 Healthy subjects                   | Fpz/Right shoulder                                                              | 1.5                              | 22                                                            | tDCS | 76 |
| (Falcone et al. 2018)                         | 28 Healthy subjects                   | P4/Left shoulder                                                                | 1                                | 30                                                            | tDCS | 77 |
| (Worsching et al. 2018)                       | 32 Healthy subjects                   | F3/F4<br>F3/Fp2<br>F4/F3                                                        | 2                                | 20                                                            | tDCS | 49 |
| (Abend et al. 2018)                           | 19 Healthy subjects                   | Fpz/Oz                                                                          | 1.5                              | 20                                                            | tDCS | 78 |
| (Antonenko et al. 2018)                       | 30 Older adults, 30<br>Young subjects | C3/Fp2                                                                          | 1                                | 15                                                            | tDCS | 27 |
| (Ulrich et al. 2018)                          | 22 Healthy subjects                   | Fpz/Right shoulder                                                              | 1.5                              | 30                                                            | tDCS | 79 |
| (Fiori et al. 2018)                           | 28 Healthy subjects                   | FC5/Fp2                                                                         | 1                                | 24                                                            | tDCS | 80 |
| (Vosskuhl, Huster, and Herrmann 2016)         | 29 Healthy subjects                   | Oz/Cz                                                                           | 0.1, 0.6, 0.2 (peak-<br>to-peak) | 18                                                            | tACS | 60 |
| (Cabral-Calderin et al. 2016)                 | 13 Healthy subjects                   | Oz/Cz                                                                           | 1.5 (peak-to-peak)               | 0.5 min ON and<br>0.5 min OFF<br>during 7 min                 | tACS | 28 |
| (Bachinger et al. 2017)                       | 20 Healthy subjects                   | C3+C4/Oz                                                                        | 1.5 (peak-to-peak)               | 14                                                            | tACS | 30 |
| (Chai et al. 2018)                            | 11 Healthy subjects                   | Oz/Cz                                                                           | 1 (peak-to-peak)                 | 12.5                                                          | tACS | 31 |
| (Weinrich et al. 2017)                        | 12 Healthy subjects                   | C3/Fp2                                                                          | 1                                | 4 runs each 1.3<br>min                                        | tACS | 81 |
| (Moisa et al. 2016)                           | 20 Healthy subjects                   | C3/Left shoulder                                                                | 1 (peak-to-peak)                 | 6 runs each 0.3<br>min                                        | tACS | 44 |
| (Violante et al. 2017)                        | 20 Healthy subjects                   | F4+P4/T8                                                                        | 1 (peak-to-peak)                 | 11.6                                                          | tACS | 29 |
| (Zoefel, Archer-Boyd, and Davis 2018)         | 17 Healthy subjects                   | T7/C3                                                                           | 1.7 (peak-to-peak)               | 30                                                            | tACS | 34 |
| (Kim et al. 2019)                             | 12 Schizophrenia                      | P4/P3<br>F4/F3                                                                  | 2                                | 20                                                            | tDCS | 35 |
| (Küper et al. 2019)                           | 51 Healthy subjects                   | Active: 3cm laterally to the<br>inion/Return: right<br>buccinator muscle        | 1.8                              | 20                                                            | tDCS | 42 |
| (Nissim et al. 2019)                          | 16 Older adults                       | F4/F3                                                                           | 2                                | 12                                                            | tDCS | 17 |
| (Antonenko et al. 2019)                       | 24 Healthy subjects                   | C3/Fp2<br>Fp2/C3                                                                | 1                                | 15                                                            | tDCS | 18 |
| (Jamil et al. 2020)                           | 29 Healthy subjects                   | Left motor cortex<br>hotspot/Right SO                                           | 0.5, 1, 1.5, 2, sham             | 15                                                            | tDCS | 39 |
| (Kar et al. 2020)                             | 10 Healthy subjects                   | Between PO7-P3/Cz                                                               | 1 (peak-to-peak)                 | 8                                                             | tACS | 40 |
| (Lefebvre et al. 2019)                        | 46 Healthy subjects                   | Montage1: HD over motor<br>hotspot<br>Montage2: HD over left<br>premotor cortex | 1                                | 7                                                             | tDCS | 82 |
| (Li, Violante, Zimmerman, et al. 2019)        | 35 TBI                                | F8/Right shoulder<br>Right shoulder/F8                                          | 2                                | 3 blocks of<br>anodal/cathodal<br>/sham (each one<br>4.2 min) | tDCS | 61 |

**Abbreviation:** ADHD: attention deficit hyperactivity disorder; MCI: mild cognitive impairment; SO: supraorbital; TBI: traumatic brain injury.

**Supplementary Table 3 | Characteristics of steering committee (SC) and expert panel (EP) members.**

| Demographic Variables            | Frequency (%)      |              |
|----------------------------------|--------------------|--------------|
|                                  | Steering Committee | Expert Panel |
| <b>Gender</b>                    |                    |              |
| Male                             | 8 (62%)            | 29 (59%)     |
| Female                           | 4 (31%)            | 11 (22%)     |
| Other                            | 1 (8%)             | 5 (10%)      |
| No response                      | 0 (0%)             | 4 (8%)       |
| <b>Age (years)</b>               |                    |              |
| 30–40                            | 4 (31%)            | 23 (47%)     |
| 40–50                            | 6 (46%)            | 10 (20%)     |
| ≥50                              | 3 (23%)            | 10 (20%)     |
| No response                      | 0 (0%)             | 6 (12%)      |
| <b>Highest Academic Degree</b>   |                    |              |
| Master of Science                | 0 (0%)             | 3 (6%)       |
| Doctor of Medicine               | 2 (15%)            | 2 (4%)       |
| Doctor of Philosophy             | 9 (69%)            | 37 (76%)     |
| Doctor of Medicine/Philosophy    | 2 (15%)            | 3 (6%)       |
| No response                      | 0 (0%)             | 4 (8%)       |
| <b>Country of Residence</b>      |                    |              |
| Austria                          | 0 (0%)             | 1 (2%)       |
| Belgium                          | 0 (0%)             | 1 (2%)       |
| Brazil                           | 0 (0%)             | 1 (2%)       |
| Canada                           | 0 (0%)             | 1 (2%)       |
| China                            | 0 (0%)             | 1 (2%)       |
| Denmark                          | 2 (15%)            | 1 (2%)       |
| France                           | 0 (0%)             | 1 (2%)       |
| Germany                          | 3 (23%)            | 14 (29%)     |
| Italy                            | 0 (0%)             | 3 (6%)       |
| Portugal                         | 1 (8%)             | 0 (0%)       |
| Switzerland                      | 0 (0%)             | 3 (6%)       |
| Taiwan                           | 0 (0%)             | 1 (2%)       |
| United Kingdom                   | 3 (23%)            | 5 (10%)      |
| United States                    | 4 (31%)            | 12 (24%)     |
| No response                      | 0 (0%)             | 4 (8%)       |
| <b>Primary Field of Research</b> |                    |              |
| Cognitive Science                | 1 (8%)             | 8 (16%)      |
| Neuroscience                     | 11 (84%)           | 24 (49%)     |
| Psychiatry                       | 0 (0%)             | 5 (10%)      |
| Psychology                       | 0 (0%)             | 5 (10%)      |
| Others                           | 1 (8%)             | 3 (6%)       |

|                                                             |         |          |
|-------------------------------------------------------------|---------|----------|
| No response                                                 | 0 (0%)  | 4 (8%)   |
| <b>Primary Place of Work</b>                                |         |          |
| Business/Industry                                           | 0 (0%)  | 3 (6%)   |
| Hospital                                                    | 1 (8%)  | 9 (18%)  |
| Independent Research Institute                              | 2 (15%) | 3 (6%)   |
| University                                                  | 9 (69%) | 29 (59%) |
| Hospital and University                                     | 1 (8%)  | 0 (0%)   |
| Others                                                      | 0 (0%)  | 1 (2%)   |
| No response                                                 | 0 (0%)  | 4 (8%)   |
| <b>Length of Time Spent in tES or fMRI Research (Years)</b> |         |          |
| Less than 5                                                 | 0 (0%)  | 1 (2%)   |
| 5–10                                                        | 3 (23%) | 10 (20%) |
| 10–20                                                       | 5 (38%) | 25 (51%) |
| ≥20                                                         | 4 (31%) | 9 (18%)  |
| No response                                                 | 1 (8%)  | 4 (8%)   |
| <b>Length of Time Spent in tES-fMRI Research (Years)</b>    |         |          |
| Less than 5                                                 | 2 (15%) | 16 (33%) |
| 5–10                                                        | 7 (54%) | 23 (47%) |
| 10–20                                                       | 2 (15%) | 4 (8%)   |
| ≥20                                                         | 1 (8%)  | 0 (0%)   |
| No response                                                 | 1 (8%)  | 6 (12%)  |

**Supplementary Table 4 | Concurrent tES-fMRI (ContES 2021) checklist, short form.**

The ContES checklist is designed to provide a short list of the main items that every concurrent tES-fMRI study should consider in the final report/paper. These items are designed as simple questions to appraise articles with Yes or No answers. Authors could provide a filled checklist including the line/page where the item is addressed in the manuscript as a supplement in the process of manuscript submission for peer reviewed journals. Additionally, the checklist provides a list of recommendations for each item that could increase the quality of reporting. Although the checklist is designed primarily to guide the development of research reports, the items and recommendations can be considered when concurrent tES-fMRI studies are being designed as well.

| Section/topic                                            | Item No | Main Items to Report                                                                                                                                                                                           | Page/Line |
|----------------------------------------------------------|---------|----------------------------------------------------------------------------------------------------------------------------------------------------------------------------------------------------------------|-----------|
| <b>Technological Factors</b>                             |         |                                                                                                                                                                                                                |           |
| Manufacturer of MR Conditional Stimulator                | 1.1     | The brand and model (if a brand is providing different MR conditional models) for the MR conditional stimulator.                                                                                               |           |
| MR Conditional Electrode Details                         | 1.2     | The MR conditional electrode type (i.e., conductive polymer with or without a sponge or other conductive medium holders).                                                                                      |           |
| Electrode Positioning                                    | 1.3     | The method for electrode placement over the head inside the scanner (i.e., targeting software, 10-20 convention with or without EEG cap, functional targeting (fMRI), computational head models or others).    |           |
| MR Conditional Skin-Electrode Interface                  | 1.4     | The MR conditional skin-electrode interface (saline solution, conductive paste, gel, etc.).                                                                                                                    |           |
| Amount of Contact Medium (Paste/Gel/Electrolyte)         | 1.5     | The amount or thickness of medium that is used for each electrode or a method to control this confounding variable.                                                                                            |           |
| Electrode Placement Visualization                        | 1.6     | Any photo/diagram/figure to precisely visualize the electrode montage inside the scanner and make replication possible.                                                                                        |           |
| RF Filter                                                | 1.7     | The RF filtering method (stimulator device connected to the subject via penetration panel (e.g., RF filters from different brands) or connected via waveguide with RF boxes on either end).                    |           |
| Wire Routing Pattern                                     | 1.8     | Wire routing pattern (out back of bore and around the control room or straight down front of bore to control room).                                                                                            |           |
| tES-fMRI Machine Synchronization/Communication           | 1.9     | The synchronization/communication method between the tES device, the stimulus delivery PC, and the scanner.                                                                                                    |           |
| <b>Safety and Noise Tests</b>                            |         |                                                                                                                                                                                                                |           |
| MR Conditionality Specifics for tES Setting              | 2.1     | The technical specifications of the MR scanner, the applied fMRI sequences, and the used tES settings and configuration to fall within the specifics of MR conditionality based on tES manufacturer guideline. |           |
| tES-fMRI Setting Test - Safety Testing                   | 2.2     | The safety of the tES-fMRI setting.                                                                                                                                                                            |           |
| tES-fMRI Setting Test - Subjective Intolerance Reporting | 2.3     | The number of cases that have not tolerated the tES/fMRI session (even if it is zero).                                                                                                                         |           |
| tES-fMRI Setting Test - Noise/Artifact                   | 2.4     | The noise/artifact induced by the tES setting in the fMRI signal with real human subjects or phantoms before starting the study (It can be reported or referred to previous studies with the same setting).    |           |
| Impedance Testing                                        | 2.5     | Impedance monitoring (i.e. before entering the scanner room and/or in the scanner room and/or inside the scanner and/or during scanning).                                                                      |           |
| <b>Methodological Factors</b>                            |         |                                                                                                                                                                                                                |           |
| Concurrent tES-fMRI Timing                               | 3.1     | The timing of concurrent tES within the fMRI paradigm.                                                                                                                                                         |           |
| Imaging Session Timing                                   | 3.2     | The imaging events before and after concurrent tES-fMRI and respective sequences.                                                                                                                              |           |
| tES Experience Report                                    | 3.3     | The assessment of the subjective experience of receiving tES inside the scanner.                                                                                                                               |           |

\*We strongly recommend that this checklist be read in conjunction with the ContES checklist development and consensus paper. The paper should be cited when using the checklist as well.

**Supplementary Table 5 | Concurrent tES-fMRI (ContES 2021) checklist, long form.**

The ContES checklist is designed to provide a short list of the main items that every concurrent tES-fMRI study should consider in the final report/paper. These items are designed as simple questions to appraise articles with Yes or No answers. Authors could provide a filled checklist including the line/page where the item is addressed in the manuscript as a supplement in the process of manuscript submission for peer reviewed journals. Additionally, the checklist provides a list of recommendations for each item that could increase the quality of reporting. Although the checklist is designed primarily to guide the development of research reports, the items and recommendations can be considered when concurrent tES-fMRI studies are being designed as well.

| Section/Topic                                                 | Main Items to Report                                                                                                                                                                                           | Page/Line | Additional Recommendations                                                                                                                                                                                                                                                                                                                                                                                                                                                                                                                                                                                                                                                      |
|---------------------------------------------------------------|----------------------------------------------------------------------------------------------------------------------------------------------------------------------------------------------------------------|-----------|---------------------------------------------------------------------------------------------------------------------------------------------------------------------------------------------------------------------------------------------------------------------------------------------------------------------------------------------------------------------------------------------------------------------------------------------------------------------------------------------------------------------------------------------------------------------------------------------------------------------------------------------------------------------------------|
| Technological Factors                                         |                                                                                                                                                                                                                |           |                                                                                                                                                                                                                                                                                                                                                                                                                                                                                                                                                                                                                                                                                 |
| 1.1. Manufacturer of MR Conditional Stimulator                | The brand and model (if a brand is providing different MR conditional models) for the MR conditional stimulator.                                                                                               |           |                                                                                                                                                                                                                                                                                                                                                                                                                                                                                                                                                                                                                                                                                 |
| 1.2. MR Conditional Electrode Details                         | The MR conditional electrode type (i.e., conductive polymer with or without a sponge or other conductive medium holders).                                                                                      |           | 1.2.1. Report conductive properties of the MR conditional electrodes, cables, contact medium, and other conductive elements, including the position and materials used for the electrode-cable connections (Saturnino et al., 2015). This is especially important if they are not from an established manufacturer or not well described in the prior literature. However, even for well-established equipment, these details are critical to report to ensure replicability.                                                                                                                                                                                                   |
| 1.3. Electrode Positioning                                    | The method for electrode placement over the head inside the scanner (i.e., targeting software, 10-20 convention with or without EEG cap, functional targeting (fMRI), computational head models or others).    |           | 1.3.1. Report electrode positioning as precisely as possible to facilitate reproduction. It is usually inadequate to simply report an anatomical target, for example, "the anodal electrode was placed over M1".                                                                                                                                                                                                                                                                                                                                                                                                                                                                |
|                                                               |                                                                                                                                                                                                                |           | 1.3.2. Report whether electrode positioning is based on the individual anatomy or a group template if imaging or head modeling is used for electrode positioning.                                                                                                                                                                                                                                                                                                                                                                                                                                                                                                               |
|                                                               |                                                                                                                                                                                                                |           | 1.3.3. Report how electrode positioning is performed at the individual participant level. For example, was a neuronavigation system used or the EEG 10-20 system or something else.                                                                                                                                                                                                                                                                                                                                                                                                                                                                                             |
|                                                               |                                                                                                                                                                                                                |           | 1.3.4. Report the methods to ensure that the same electrode locations were used again if there are multiple sessions.                                                                                                                                                                                                                                                                                                                                                                                                                                                                                                                                                           |
|                                                               |                                                                                                                                                                                                                |           | 1.3.5. Report clearly how the electrodes are held in place inside the scanner including use of head-gear or customized supports.                                                                                                                                                                                                                                                                                                                                                                                                                                                                                                                                                |
| 1.4. MR Conditional Skin-Electrode Interface                  | The MR conditional skin-electrode interface (saline solution, conductive paste, gel, etc.).                                                                                                                    |           | 1.3.6. Report how electrodes and their connecting cables over the head are located in relationship to the MR head coil while the subject is laying down inside the scanner and how the head was held in place - e.g., pillows, foam, etc. to ensure that position of head/electrodes remain in the same place during the scans while the convenience of the participant is ensured.                                                                                                                                                                                                                                                                                             |
|                                                               |                                                                                                                                                                                                                |           | 1.3.7. Report a post-hoc validation of the electrode positioning based on anatomical images with the electrodes in place if practical. For optimal validation, current density models based on anatomical images may be used (e.g., ROAST, SIMNIBS, etc.). It would be even better to directly measure the electric fields using magnetic resonance current density imaging (MRCDI) and MR electrical impedance tomography (MREIT) (Göksu et al., 2018), however, MREIT and MRCDI are still not available in most of the institutes.                                                                                                                                            |
| 1.5. Amount of Contact Medium (Paste/Gel/Electrolyte)         | The amount or thickness of medium that is used for each electrode or a method to control this confounding variable.                                                                                            |           | 1.4.1. Report a photo or a schematic figure or technical details showing in a reproducible way how the electrode with the MR conditional skin-electrode interface is connected to the cranium (including a view from the underneath of the electrode if needed). If headgear or headstraps obscure the electrodes, you may provide an image without the headstraps.                                                                                                                                                                                                                                                                                                             |
|                                                               |                                                                                                                                                                                                                |           | 1.4.2. Report any other MR-specific strategies to restrict the contact medium (such as within an electrode holder) to avoid short circuits.                                                                                                                                                                                                                                                                                                                                                                                                                                                                                                                                     |
| 1.6. Electrode Placement Visualization                        | Any photo/diagram/figure to precisely visualize the electrode montage inside the scanner and make replication possible.                                                                                        |           | 1.5.1. Report technical details/difficulties in measuring the thickness of the layer of conductive material underneath the electrodes and how cream/gel underneath the electrodes is evenly distributed. Although this can be important, mainly when having big electrodes, in practice, the amount of cream/gel underneath the electrodes may not be evenly distributed. Developing new methods to measure, control, and report this important variable are desired. Reporting the impedance (before, during, and after stimulation) provides insight on electrode contact quality, but is not in itself a substitute for controlling and reporting contact medium parameters. |
| 1.7. RF Filter                                                | The RF filtering method (stimulator device connected to the subject via penetration panel (e.g., RF filters from different brands) or connected via waveguide with RF boxes on either end).                    |           | 1.7.1. Report the attenuation characteristic of the RF filtering.                                                                                                                                                                                                                                                                                                                                                                                                                                                                                                                                                                                                               |
| 1.8. Wire Routing Pattern                                     | Wire routing pattern (out back of bore and around the control room or straight down front of bore to control room).                                                                                            |           | 1.7.2. Report any potential regulatory consideration/limitation at the institute/university/country level.                                                                                                                                                                                                                                                                                                                                                                                                                                                                                                                                                                      |
|                                                               |                                                                                                                                                                                                                |           | 1.8.1. Report whether/how the state of the cables is checked after the subject entering the scanner to avoid creating any loops.                                                                                                                                                                                                                                                                                                                                                                                                                                                                                                                                                |
|                                                               |                                                                                                                                                                                                                |           | 1.8.2. Report the length of the cables required to connect inner with outer box using box cable, how the cables are connected to the electrodes, in which direction the cables are leaving the head, how multiple connecting cables are managed together, and depending on the geometry of the head coil, how the cables are entered into the coil. A sketch might be helpful to visualize these details.                                                                                                                                                                                                                                                                       |
|                                                               |                                                                                                                                                                                                                |           | 1.8.3. Report how the cables and filter boxes are secured to prevent motion during the scan (i.e., sandbag, tape, etc.).                                                                                                                                                                                                                                                                                                                                                                                                                                                                                                                                                        |
|                                                               |                                                                                                                                                                                                                |           | 1.8.4. Report if there are any modifications from manufacturer recommendations.                                                                                                                                                                                                                                                                                                                                                                                                                                                                                                                                                                                                 |
| 1.9. tES-fMRI Machine Synchronization/Communication           | The synchronization/communication method between the tES device, the stimulus delivery PC, and the scanner.                                                                                                    |           | 1.8.5. Report any potential regulatory consideration/limitation at the institute/university/country level.                                                                                                                                                                                                                                                                                                                                                                                                                                                                                                                                                                      |
| Safety and Noise Tests                                        |                                                                                                                                                                                                                |           |                                                                                                                                                                                                                                                                                                                                                                                                                                                                                                                                                                                                                                                                                 |
| 2.1. MR Conditionality Specifics for tES Setting              | The technical specifications of the MR scanner, the applied fMRI sequences, and the used tES settings and configuration to fall within the specifics of MR conditionality based on tES manufacturer guideline. |           | 1.9.1. Report any synchronization between tES and MRI. Synchronization/communication can be TTL scanner sync pulse to trigger/sync (tES and/or non-tES) stimulus recorded via USB/parallel port/Ni device; use of markers for tES, or manual triggering of the tES device.                                                                                                                                                                                                                                                                                                                                                                                                      |
| 2.2. tES-fMRI Setting Test - Safety Testing                   | The safety of the tES-fMRI setting.                                                                                                                                                                            |           | 2.1.1. Report the technical specifications of the MR scanner, including field strength, RF transmit coil type, maximal transmit power, and the number of head coil channels. Standard guidelines for proper reporting on MRI/fMRI parameters should be considered (Grainger, 2014; Nichols et al., 2017; Poldrack et al., 2008).                                                                                                                                                                                                                                                                                                                                                |
|                                                               |                                                                                                                                                                                                                |           | 2.1.2. Report the details of MR conditionality that are demonstrated by the manufacturer of the tES equipment for specific conditions of use.                                                                                                                                                                                                                                                                                                                                                                                                                                                                                                                                   |
|                                                               |                                                                                                                                                                                                                |           | 2.2.1. Report safety tests and respective details which include but are not limited to impedance testing, temperature testing (any temperature change under electrodes) and electric current tolerance testing, etc. with real human subjects or phantoms. Whenever the safety testing is referred to a previous study, it is still recommended to provide a brief description of the safety tests that have been considered.                                                                                                                                                                                                                                                   |
| 2.3. tES-fMRI Setting Test - Subjective Intolerance Reporting | The number of cases that have not tolerated the tES/fMRI session (even if it is zero).                                                                                                                         |           | 2.2.2. Report the occurrence/absence of any safety incidents.                                                                                                                                                                                                                                                                                                                                                                                                                                                                                                                                                                                                                   |
| 2.4. tES-fMRI Setting Test - Noise/Artifact                   | The noise/artifact induced by the tES setting in the fMRI signal with real human subjects or phantoms before starting the study (It can be reported or referred to previous studies with the same setting).    |           | 2.3.1. Report the reasons that participants have not tolerated the tES/fMRI session if any (i.e., burning sensation, increased temperature, pain, shortness of breath, nausea, etc.).                                                                                                                                                                                                                                                                                                                                                                                                                                                                                           |
|                                                               |                                                                                                                                                                                                                |           | 2.4.1. Report or cite prior analysis on the degree to which the equipment alone, and the equipment during stimulation affects the SNR. Importantly, such analysis is specific to the protocol (electrode preparation, imaging sequence) such that claims cannot be automatically generalized without analysis. For instance, "8% as described in (Antal et al., 2011) ("... SNR was hardly reduced with decreases ranging from 3 to 8% for the different ROIs and setups, even in the gray matter ROI in M1 targeted by tDCS...").                                                                                                                                              |
|                                                               |                                                                                                                                                                                                                |           | 2.4.2. Report how many participants, or runs were excluded from the analysis due to artifacts. Exclusion criteria should be reported as well (e.g., based on visual inspection or any data analysis tool that might detect artifacts for single runs).                                                                                                                                                                                                                                                                                                                                                                                                                          |
|                                                               |                                                                                                                                                                                                                |           | 2.4.3. Report the quantification of the possible increase in artifact or noise if the task-related fMRI requires the use of some other devices, such as tactile/pain stimulators, olfactory or juice machines, etc. (e.g., compare the noise/artifacts of the tES-fMRI setup alone with the tES-fMRI setup with the addition of the respective device).                                                                                                                                                                                                                                                                                                                         |
|                                                               |                                                                                                                                                                                                                |           | 2.4.4. Report baseline "pre-tES" fMRI as a part of the data acquisition sequence in the imaging session to investigate the effects/noise introduced by the tES setup per se (without any stimulation and within subject). Although this will not be sufficient to fully control for noise induced by tES administration with problems such as scanner drift, and the order effect.                                                                                                                                                                                                                                                                                              |
| 2.5. Impedance Testing                                        | Impedance monitoring (i.e. before entering the scanner room and/or in the scanner room and/or inside the scanner and/or during scanning).                                                                      |           | 2.4.5. Report any special fMRI processing measures or assessments that are used to deal with tES-induced imaging artifacts if applicable.                                                                                                                                                                                                                                                                                                                                                                                                                                                                                                                                       |
|                                                               |                                                                                                                                                                                                                |           | 2.5.1. Report the impedance (i.e. cut off criterion programmed in the device, or measures on an individual basis with mean/range across groups before, during, and after scanning).                                                                                                                                                                                                                                                                                                                                                                                                                                                                                             |
| Methodological Factors                                        |                                                                                                                                                                                                                |           |                                                                                                                                                                                                                                                                                                                                                                                                                                                                                                                                                                                                                                                                                 |
| 3.1. Concurrent tES-fMRI Timing                               | The timing of concurrent tES within the fMRI paradigm.                                                                                                                                                         |           | 2.5.2. Report the methods applied to verify the current delivered inside the scanner (if any). Some devices already include an independent current meter and some investigators use their own external devices.                                                                                                                                                                                                                                                                                                                                                                                                                                                                 |
|                                                               |                                                                                                                                                                                                                |           | 3.1.1. Providing schematic diagrams is strongly encouraged to achieve maximum clarity for the reader.                                                                                                                                                                                                                                                                                                                                                                                                                                                                                                                                                                           |
|                                                               |                                                                                                                                                                                                                |           | 3.1.2. Report carry-over effects between different stimulation conditions and different brain states. How such effects have been considered or mitigated should be discussed.                                                                                                                                                                                                                                                                                                                                                                                                                                                                                                   |



|                             |                                                                                   |                                                                                                                                                                                                                                                                                                                                                                                                                                                                                                                                                                                                                                                                                                                                                                                                                                                                                                                                                                                                                                                                                                                                                                                                                                                                                                                                                                                                                                                                                                                                            |
|-----------------------------|-----------------------------------------------------------------------------------|--------------------------------------------------------------------------------------------------------------------------------------------------------------------------------------------------------------------------------------------------------------------------------------------------------------------------------------------------------------------------------------------------------------------------------------------------------------------------------------------------------------------------------------------------------------------------------------------------------------------------------------------------------------------------------------------------------------------------------------------------------------------------------------------------------------------------------------------------------------------------------------------------------------------------------------------------------------------------------------------------------------------------------------------------------------------------------------------------------------------------------------------------------------------------------------------------------------------------------------------------------------------------------------------------------------------------------------------------------------------------------------------------------------------------------------------------------------------------------------------------------------------------------------------|
| 3.2. Imaging Session Timing | The imaging events before and after concurrent tES-fMRI and respective sequences. | <p>3.2.1. Report the exact timing of all imaging events (structural or functional) before and after concurrent tES-fMRI.</p> <p>3.2.2. Report when the tES setup is placed on the participant e.g., if the tES setup was placed on the participant at the start of the tES-fMRI session (and was therefore on the participant during other non-fMRI sequences).</p> <p>3.2.3. In tACS studies, report how stimulation frequency is matched with TR. To reduce potential sources of biases in tACS-fMRI studies, the stimulation frequency should be set such that a full number of cycles fits into the TR of the functional measurement (Antal et al., 2014) (post-mortem study). Otherwise, the tissue polarization might be averaged over the time of one volume measured.</p>                                                                                                                                                                                                                                                                                                                                                                                                                                                                                                                                                                                                                                                                                                                                                          |
| 3.3. tES Experience Report  | The assessment of the subjective experience of receiving tES inside the scanner.  | <p>3.3.1. Report the general experience (comfort/fatigue) and participant's other experiences with the stimulation - as some tES montages/protocols might be more uncomfortable/perceptible than others when lying inside the scanner and this could be a confounder when comparing across stimulation montages. Options include: assessing participant ratings of symptoms for each condition, asking participants whether they perceived stimulation or not for each condition, reporting on the presence and intensity of phosphenes/tactile sensation (in the case of tACS), etc. This is important as it could show whether participants can differentiate between stimulation conditions (e.g., between active and sham stimulation, or between different frequencies (in the case of tACS). Having different side effects between sessions does not necessarily mean that subjects can discern and are unblinded.</p> <p>3.3.2. Report electric current tolerance for subject comfort (i.e. before entering scanner room (if technically possible) and/or in the scanner room and inside the scanner and/or during scanning (as appropriate)).</p> <p>3.3.3. Report any instructions, training, or exposure provided before the tES-fMRI session to make the experiment more convenient for the participants.</p> <p>3.3.4. Report the exact wording or provide citations of the questions or questionnaires used to report on the subjective experience of receiving tES inside the scanner in the article or its supplements.</p> |
| General Recommendations     |                                                                                   | <p>0.0.1. Report handedness of subject as a potential source of variability of tES-fMRI studies. This interaction could be addressed in relevant contexts either by limiting the sample to right-handed individuals, reporting handedness with quantitative standard instruments, or through methodological/analytical approaches which should be reported.</p> <p>0.0.2. If possible, present the online tES electrodes as additional bumps in the surface/mesh reconstruction. This is a good possibility to determine the exact location of the online electrodes. However, this non-biological reconstruction may also influence simulations, so performance of additional structural T1w and T2w scans without the electrodes whenever possible is advantageous.</p>                                                                                                                                                                                                                                                                                                                                                                                                                                                                                                                                                                                                                                                                                                                                                                  |

\*We strongly recommend that this checklist be read in conjunction with the ContES checklist development and consensus paper. The paper should be cited when using the checklist as well.

## References

1. Woods, A. J. *et al.* A technical guide to tDCS, and related non-invasive brain stimulation tools. *Clin. Neurophysiol.* **127**, 1031–1048 (2016).
2. Hauser, T. U. *et al.* Neurocognitive Effects of Transcranial Direct Current Stimulation in Arithmetic Learning and Performance: A Simultaneous tDCS-fMRI Study. *Brain Stimul.* **9**, 850–858 (2016).
3. Alekseichuk, I., Diers, K., Paulus, W. & Antal, A. Transcranial electrical stimulation of the occipital cortex during visual perception modifies the magnitude of BOLD activity: a combined tES-fMRI approach. *Neuroimage* **140**, 110–117 (2016).
4. Saturnino, G. B., Antunes, A. & Thielscher, A. On the importance of electrode parameters for shaping electric field patterns generated by tDCS. *Neuroimage* **120**, 25–35 (2015).
5. Worsching, J. *et al.* Test-retest reliability of prefrontal transcranial Direct Current Stimulation (tDCS) effects on functional MRI connectivity in healthy subjects. *Neuroimage* **155**, 187–201 (2017).
6. Lin, R. L. *et al.* Structural Connectivity Variances Underlie Functional and Behavioral Changes During Pain Relief Induced by Neuromodulation. *Sci. Rep.* **7**, 41603 (2017).
7. Minhas, P., Bikson, M., Woods, A. J., Rosen, A. R. & Kessler, S. K. Transcranial direct current stimulation in pediatric brain: a computational modeling study. *Conf. Proc. ... Annu. Int. Conf. IEEE Eng. Med. Biol. Soc. IEEE Eng. Med. Biol. Soc. Annu. Conf.* **2012**, 859–62 (2012).
8. Woods, A. J., Bryant, V., Sacchetti, D., Gervits, F. & Hamilton, R. Effects of Electrode Drift in Transcranial Direct Current Stimulation. *Brain Stimul.* **8**, 515–9 (2015).
9. Ruffini, G., Fox, M. D., Ripolles, O., Miranda, P. C. & Pascual-Leone, A. Optimization of multifocal transcranial current stimulation for weighted cortical pattern targeting from realistic modeling of electric fields. *Neuroimage* **89**, 216–225 (2014).
10. Bergmann, T. O., Karabanov, A., Hartwigsen, G., Thielscher, A. & Siebner, H. R. Combining non-invasive transcranial brain stimulation with neuroimaging and electrophysiology: Current approaches and future perspectives. *Neuroimage* **140**, 4–19 (2016).
11. Zheng, X., Dai, W., Alsop, D. C. & Schlaug, G. Modulating transcallosal and intra-hemispheric brain connectivity with tDCS: Implications for interventions in Aphasia. *Restor. Neurol. Neurosci.* **34**, 519–530 (2016).
12. Yang, L.-Z. *et al.* Electrical stimulation reduces smokers' craving by modulating the coupling between dorsal lateral prefrontal cortex and parahippocampal gyrus. *Soc. Cogn. Affect. Neurosci.* **12**, 1296–1302 (2017).
13. Esmaeilpour, Z. *et al.* Methodology for tDCS integration with fMRI. *Hum. Brain Mapp.* **41**, (2020).
14. Lindenberg, R., Sieg, M. M., Meinzer, M., Nachtigall, L. & Flöel, A. Neural correlates of unihemispheric and bihemispheric motor cortex stimulation in healthy young adults. *Neuroimage* **140**, 141–149 (2016).
15. Barron, H. C. *et al.* Unmasking Latent Inhibitory Connections in Human Cortex to Reveal Dormant Cortical Memories. *Neuron* **90**, 191–203 (2016).
16. DosSantos, M. F. *et al.* Immediate Effects of tDCS on the  $\mu$ -Opioid System of a Chronic Pain Patient. *Front. Psychiatry* **0**, 93 (2012).
17. Nissim, N. R. *et al.* Effects of in-Scanner Bilateral Frontal tDCS on Functional Connectivity of the Working Memory Network in Older Adults. *Front. Aging Neurosci.* **0**, 51 (2019).
18. Antonenko, D. *et al.* Towards precise brain stimulation: Is electric field simulation related to neuromodulation? *Brain Stimul.* **12**, 1159–1168 (2019).
19. Antal, A., Polania, R., Schmidt-Samoa, C., Dechent, P. & Paulus, W. Transcranial direct current stimulation over the primary motor cortex during fMRI. *Neuroimage* **55**, 590–596 (2011).
20. Meinzer, M. *et al.* Transcranial direct current stimulation and simultaneous functional magnetic resonance imaging. *J. Vis. Exp.* (2014) doi:10.3791/51730.

21. Turi, Z., Paulus, W. & Antal, A. Functional neuroimaging and transcranial electrical stimulation. *Clin. EEG Neurosci.* **43**, 200–208 (2012).
22. Meinzer, M. *et al.* Transcranial direct current stimulation of the primary motor cortex improves word-retrieval in older adults. *Front. Aging Neurosci.* **6**, (2014).
23. Meinzer, M., Lindenberg, R., Antonenko, D., Fleisch, T. & Floel, A. Anodal transcranial direct current stimulation temporarily reverses age-associated cognitive decline and functional brain activity changes. *J. Neurosci.* **33**, 12470–12478 (2013).
24. Lindenberg, R., Nachtigall, L., Meinzer, M., Sieg, M. M. & Floel, A. Differential effects of dual and unihemispheric motor cortex stimulation in older adults. *J. Neurosci.* **33**, 9176–9183 (2013).
25. Alon, G., Roys, S. R., Gullapalli, R. P. & Greenspan, J. D. Non-invasive electrical stimulation of the brain (ESB) modifies the resting-state network connectivity of the primary motor cortex: a proof of concept fMRI study. *Brain Res.* **1403**, 37–44 (2011).
26. Williams, K. A. *et al.* Simultaneous Transcranial Alternating Current Stimulation and Functional Magnetic Resonance Imaging. *J. Vis. Exp.* (2017) doi:10.3791/55866.
27. Antonenko, D. *et al.* Age-dependent effects of brain stimulation on network centrality. *Neuroimage* **176**, 71–82 (2018).
28. Cabral-Calderin, Y. *et al.* Transcranial alternating current stimulation affects the BOLD signal in a frequency and task-dependent manner. *Hum. Brain Mapp.* **37**, 94–121 (2016).
29. Violante, I. R. *et al.* Externally induced frontoparietal synchronization modulates network dynamics and enhances working memory performance. *Elife* **6**, (2017).
30. Bachinger, M. *et al.* Concurrent tACS-fMRI Reveals Causal Influence of Power Synchronized Neural Activity on Resting State fMRI Connectivity. *J. Neurosci.* **37**, 4766–4777 (2017).
31. Chai, Y., Sheng, J., Bandettini, P. A. & Gao, J.-H. Frequency-dependent tACS modulation of BOLD signal during rhythmic visual stimulation. *Hum. Brain Mapp.* **39**, 2111–2120 (2018).
32. Poldrack, R. A. *et al.* Guidelines for reporting an fMRI study. *NeuroImage* vol. 40 409–414 (2008).
33. Nichols, T. E. *et al.* Best practices in data analysis and sharing in neuroimaging using MRI. *Nature Neuroscience* vol. 20 299–303 (2017).
34. Zoefel, B., Archer-Boyd, A. & Davis, M. H. Phase Entrainment of Brain Oscillations Causally Modulates Neural Responses to Intelligible Speech. *Curr. Biol.* **28**, 401–408.e5 (2018).
35. Kim, J. *et al.* Modulation of brain activity with transcranial direct current stimulation: Targeting regions implicated in impaired illness awareness in schizophrenia. *Eur. Psychiatry* **61**, 63–71 (2019).
36. Dempsey, M. F., Condon, B. & Hadley, D. M. Investigation of the factors responsible for burns during MRI. *J. Magn. Reson. Imaging* **13**, 627–631 (2001).
37. Dempsey, M. F. & Condon, B. Thermal injuries associated with MRI. *Clinical Radiology* vol. 56 457–465 (2001).
38. Kozlov, M. *et al.* RF safety of transcranial direct current stimulation equipment during MRI. (2018).
39. Jamil, A. *et al.* Current intensity- and polarity-specific online and aftereffects of transcranial direct current stimulation: An fMRI study. *Hum. Brain Mapp.* **41**, 1644–1666 (2020).
40. Kar, K., Ito, T., Cole, M. W. & Krekelberg, B. Sensory Processing: Transcranial alternating current stimulation attenuates BOLD adaptation and increases functional connectivity. *J. Neurophysiol.* **123**, 428 (2020).
41. Antal, A. *et al.* Low intensity transcranial electric stimulation: Safety, ethical, legal regulatory and application guidelines. *Clin. Neurophysiol.* **128**, 1774–1809 (2017).
42. Küper, M. *et al.* Cerebellar transcranial direct current stimulation modulates the fMRI signal in the cerebellar nuclei in a simple motor task. *Brain Stimul.* **12**, 1169–1176 (2019).

43. Abend, R. *et al.* Modulating Emotional Experience Using Electrical Stimulation of the Medial-Prefrontal Cortex: A Preliminary tDCS-fMRI Study. *Neuromodulation Technol. Neural Interface* (2018) doi:10.1111/ner.12787.
44. Moisa, M., Polania, R., Grueschow, M. & Ruff, C. C. Brain Network Mechanisms Underlying Motor Enhancement by Transcranial Entrainment of Gamma Oscillations. *J. Neurosci.* **36**, 12053–12065 (2016).
45. Sotnikova, A., Soff, C., Tagliazucchi, E., Becker, K. & Siniatchkin, M. Transcranial direct current stimulation modulates neuronal networks in attention deficit hyperactivity disorder. *Brain Topogr.* **30**, 656–672 (2017).
46. Stecker, M. M. & Patterson, T. Electrode Impedance in Neurophysiologic Recordings: 1. Theory and Intrinsic Contributions to Noise. <http://dx.doi.org/10.1080/1086508X.1998.11079227> **38**, 174–198 (2015).
47. Stecker, M. M. & Patterson, T. Electrode Impedance in Neurophysiologic Recordings: 2. Role in Electromagnetic Interference. <http://dx.doi.org/10.1080/1086508X.1999.11079246> **39**, 34–51 (2015).
48. Li, L. M. *et al.* Cognitive enhancement with Salience Network electrical stimulation is influenced by network structural connectivity. *Neuroimage* **185**, 425–433 (2019).
49. Worsching, J. *et al.* Testing assumptions on prefrontal transcranial direct current stimulation: Comparison of electrode montages using multimodal fMRI. *Brain Stimul.* **11**, 998–1007 (2018).
50. Sehm, B., Kipping, J., Schäfer, A., Villringer, A. & Ragert, P. A comparison between uni- and bilateral tDCS effects on functional connectivity of the human motor cortex. *Front. Hum. Neurosci.* **7**, (2013).
51. Sehm, B. *et al.* Dynamic modulation of intrinsic functional connectivity by transcranial direct current stimulation. *J. Neurophysiol.* **108**, 3253–3263 (2012).
52. Li, L. M. *et al.* Brain state and polarity dependent modulation of brain networks by transcranial direct current stimulation. *Hum. Brain Mapp.* **40**, 904–915 (2019).
53. Antonenko, D. *et al.* tDCS-Induced Modulation of GABA Levels and Resting-State Functional Connectivity in Older Adults. *J. Neurosci.* **37**, 4065–4073 (2017).
54. Darkow, R., Martin, A., Wurtz, A., Floel, A. & Meinzer, M. Transcranial direct current stimulation effects on neural processing in post-stroke aphasia. *Hum. Brain Mapp.* **38**, 1518–1531 (2017).
55. Dutta, A., Jacob, A., Chowdhury, S. R., Das, A. & Nitsche, M. A. EEG-NIRS Based Assessment of Neurovascular Coupling During Anodal Transcranial Direct Current Stimulation - a Stroke Case Series. *J. Med. Syst.* **39**, (2015).
56. Durand, S., Fromy, B., Bouyé, P., Saumet, J. L. & Abraham, P. Vasodilatation in response to repeated anodal current application in the human skin relies on aspirin-sensitive mechanisms. *J. Physiol.* **540**, 261–269 (2002).
57. Orlov, N. D. *et al.* Stimulating thought: a functional MRI study of transcranial direct current stimulation in schizophrenia. *Brain* **140**, 2490–2497 (2017).
58. Stagg, C. J. *et al.* Widespread modulation of cerebral perfusion induced during and after transcranial direct current stimulation applied to the left dorsolateral prefrontal cortex. *J. Neurosci.* **33**, 11425–11431 (2013).
59. Misselhorn, J., Schwab, B. C., Schneider, T. R. & Engel, A. K. Synchronization of sensory gamma oscillations promotes multisensory communication. *eNeuro* **6**, (2019).
60. Vosskuhl, J., Huster, R. J. & Herrmann, C. S. BOLD signal effects of transcranial alternating current stimulation (tACS) in the alpha range: A concurrent tACS-fMRI study. *Neuroimage* **140**, 118–125 (2016).
61. Li, L. M. *et al.* Traumatic axonal injury influences the cognitive effect of non-invasive brain stimulation. *Brain* **142**, 3280–3293 (2019).
62. Callan, D. E., Falcone, B., Wada, A. & Parasuraman, R. Simultaneous tDCS-fMRI Identifies Resting State Networks Correlated with Visual Search Enhancement. *Front. Hum. Neurosci.* **10**, 72 (2016).
63. Sotnikova, A., Soff, C., Tagliazucchi, E., Becker, K. & Siniatchkin, M. Transcranial Direct Current Stimulation Modulates Neuronal Networks in Attention Deficit Hyperactivity Disorder. *Brain Topogr.* **2017 305** **30**, 656–672 (2017).
64. Holland, R., Leff, A. P., Penny, W. D., Rothwell, J. C. & Crinion, J. Modulation of frontal effective connectivity during

- speech. *Neuroimage* **140**, 126–133 (2016).
65. Meinzer, M. *et al.* Transcranial direct current stimulation in mild cognitive impairment: Behavioral effects and neural mechanisms. *Alzheimers. Dement.* **11**, 1032–1040 (2015).
  66. Antal, A. *et al.* Transcranial electrical stimulation modifies the neuronal response to psychosocial stress exposure. *Hum. Brain Mapp.* **35**, 3750–3759 (2014).
  67. Martin, A. K. *et al.* Effects of Transcranial Direct Current Stimulation on Neural Networks Structure in Young and Older Adults. *J. Cogn. Neurosci.* (2017).
  68. Saiote, C., Polania, R., Rosenberger, K., Paulus, W. & Antal, A. High-frequency TRNS reduces BOLD activity during visuomotor learning. *PLoS One* **8**, e59669 (2013).
  69. Kwon, Y. H. & Jang, S. H. Onsite-effects of dual-hemisphere versus conventional single-hemisphere transcranial direct current stimulation: A functional MRI study. *Neural Regen. Res.* **7**, 1889–1894 (2012).
  70. Meinzer, M. *et al.* Electrical brain stimulation improves cognitive performance by modulating functional connectivity and task-specific activation. *J. Neurosci.* **32**, 1859–1866 (2012).
  71. Zheng, X., Alsop, D. C. & Schlaug, G. Effects of transcranial direct current stimulation (tDCS) on human regional cerebral blood flow. *Neuroimage* **58**, 26–33 (2011).
  72. Holland, R. *et al.* Speech facilitation by left inferior frontal cortex stimulation. *Curr. Biol.* **21**, 1403–1407 (2011).
  73. Kwon, Y. H. & Jang, S. H. The enhanced cortical activation induced by transcranial direct current stimulation during hand movements. *Neurosci. Lett.* **492**, 105–108 (2011).
  74. Antal, A., Polania, R., Schmidt-Samoa, C., Dechent, P. & Paulus, W. Transcranial direct current stimulation over the primary motor cortex during fMRI. *Neuroimage* **55**, 590–596 (2011).
  75. Kwon, Y. H. *et al.* Primary motor cortex activation by transcranial direct current stimulation in the human brain. *Neurosci. Lett.* **435**, 56–59 (2008).
  76. Gilam, G. *et al.* Attenuating anger and aggression with neuromodulation of the vmPFC: A simultaneous tDCS-fMRI study. *Cortex* **109**, 156–170 (2018).
  77. Falcone, B., Wada, A., Parasuraman, R. & Callan, D. E. Individual differences in learning correlate with modulation of brain activity induced by transcranial direct current stimulation. *PLoS One* **13**, e0197192 (2018).
  78. Abend, R. *et al.* Modulating Emotional Experience Using Electrical Stimulation of the Medial-Prefrontal Cortex: A Preliminary tDCS-fMRI Study. *Neuromodulation* (2018) doi:10.1111/ner.12787.
  79. Ulrich, M. *et al.* The neural correlates of flow experience explored with transcranial direct current stimulation. *Exp. brain Res.* (2018) doi:10.1007/s00221-018-5378-0.
  80. Fiori, V., Kunz, L., Kuhnke, P., Marangolo, P. & Hartwigsen, G. Transcranial direct current stimulation (tDCS) facilitates verb learning by altering effective connectivity in the healthy brain. *Neuroimage* **181**, 550–559 (2018).
  81. Weinrich, C. A. *et al.* Modulation of Long-Range Connectivity Patterns via Frequency-Specific Stimulation of Human Cortex. *Curr. Biol.* **27**, 3061-3068.e3 (2017).
  82. Lefebvre, S. *et al.* Differences in high-definition transcranial direct current stimulation over the motor hotspot versus the premotor cortex on motor network excitability. *Sci. Reports* **9**, 1–15 (2019).
